# Supplementary material
Source: publisher site journal article supplement (https://www.dovepress.com/article/582714)
Supplement: Supplementary file 1 [file 582714%20Revised%20Supplementary%20Table.docx]

**Supplementary Table S1.** Subgroup analysis of diagnostic performance using one-vs-rest classification.

| **Subgroup** | **Level** | **Model** | **Normal** | **Mild** | **Moderate** | **Severe** |
| --- | --- | --- | --- | --- | --- | --- |
| **Sex** | Male | Snore | 0.79 (0.51–1.00) | 0.87 (0.81–0.94) | 0.68 (0.58–0.78) | 0.85 (0.78–0.93) |
|  | Male | Wearable | 0.84 (0.65–1.00) | 0.78 (0.67–0.89) | 0.72 (0.60–0.84) | 0.89 (0.81–0.96) |
| **Sex** | Female | Snore | 0.74 (0.52–0.97) | 0.61 (0.31–0.91) | 0.70 (0.49–0.91) | 0.92 (0.80–1.00) |
|  | Female | Wearable | 0.57 (0.28–0.85) | 0.60 (0.26–0.94) | 0.71 (0.39–1.00) | 0.77 (0.44–1.00) |
| **Age** | <41 | Snore | 0.92 (0.84–1.00) | 0.85 (0.76–0.95) | 0.59 (0.44–0.75) | 0.92 (0.85–0.99) |
|  | <41 | Wearable | 0.83 (0.68–0.98) | 0.65 (0.46–0.83) | 0.73 (0.56–0.89) | 0.90 (0.80–1.00) |
| **Age** | ≥41 | Snore | 0.66 (0.24–1.00) | 0.85 (0.77–0.93) | 0.74 (0.63–0.85) | 0.85 (0.76–0.94) |
|  | ≥41 | Wearable | 0.64 (0.39–0.89) | 0.82 (0.71–0.93) | 0.71 (0.56–0.85) | 0.83 (0.73–0.94) |
| **BMI** | <25.2 | Snore | 0.78 (0.55–1.00) | 0.86 (0.76–0.96) | 0.60 (0.44–0.75) | 0.86 (0.75–0.96) |
|  | <25.2 | Wearable | 0.69 (0.50–0.89) | 0.76 (0.58–0.94) | 0.63 (0.44–0.81) | 0.87 (0.75–0.98) |
| **BMI** | ≥25.2 | Snore | 0.87 (0.69–1.00) | 0.82 (0.74–0.91) | 0.76 (0.65–0.88) | 0.90 (0.83–0.97) |
|  | ≥25.2 | Wearable | 0.89 (0.80–0.98) | 0.75 (0.62–0.88) | 0.77 (0.64–0.91) | 0.89 (0.80–0.97) |

a: Values are presented as AUC (95% confidence interval).

b: Confidence intervals could not be estimated in subgroups with very small numbers of positive cases, where reliable interval estimation was not feasible.

c: SAHS severity was classified according to PSG-derived AHI as follows: normal (AHI < 5 events/h), mild (5 ≤ AHI < 15 events/h), moderate (15 ≤ AHI < 30 events/h), and severe (AHI ≥ 30 events/h).

d: Subgroup analyses were performed using a one-versus-rest (OVR) approach, in which each severity category was compared against all remaining categories.
